# Supplementary material for: Si3C Monolayer as an Efficient Metal-Free Catalyst for Nitrate Electrochemical Reduction: A Computational Study
Source: MDPI journal article supplement (doi:10.3390/nano13212890), 2023-10-31
Supplement: s1 [file s1]

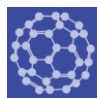

# Si<sub>3</sub>C Monolayer as an Efficient Metal-Free Catalyst for Nitrate Electrochemical Reduction: A Computational Study

Wanying Guo <sup>1</sup>, Tiantian Zhao <sup>1</sup>, Fengyu Li <sup>2,\*</sup>, Qinghai Cai <sup>1</sup> and Jingxiang Zhao <sup>1,\*</sup>

<sup>1</sup> College of Chemistry and Chemical Engineering, and Key Laboratory of Photonic and Electronic Bandgap Materials, Ministry of Education, Harbin Normal University, Harbin 150025, China; guowanying@stu.hrbnu.edu.cn (W.G.); zhaotiantian@stu.hrbnu.edu.cn (T.Z.); caiqinghai@hrbnu.edu.cn (Q.C.)

<sup>2</sup> School of Physical Science and Technology, Inner Mongolia University, Hohhot 010021, China

\* Correspondence: fengyuli@imu.edu.cn (F.L.); zhaojingxiang@hrbnu.edu.cn (J.Z.)

## COMPUTATIONAL DETAILS

### Constant-Potential Computations

In the constant-potential calculations, to clarify the reaction mechanism at different electrode potentials, we changed the excess charge per unit cell ( $\Delta n$ ) from  $-2.0 e^-$  to  $+2.0 e^-$ , with a step of  $0.5 e^-$ . The potential related energy of the system is defined as follows:

$$E = E_{DFT} - \Delta n(V_{sol} + \varphi_q/e)$$

where  $E_{DFT}$  is the DFT-calculated energy,  $V_{sol}$  is the electrostatic potential of the bulk electrolyte, and  $-\varphi_q$  is the work function of the charged system.

The electric potential of the slab referenced to the SHE is calculated as:

$$U_q(U/SHE) = -4.6 - \varphi_q(f) \text{ (eV)}$$

where  $-\varphi_q(f)$  is the work function of the charged slab in aqueous solution and 4.6 V is the work function of the H<sub>2</sub>/H<sup>+</sup> couple at standard conditions. In fact, the work function measured by SHE is dispersed from 4.4 to 4.8 eV, and our calculation took the average of 4.6 eV.

The E-U<sub>q</sub> quadratic form could be written as:

$$E(U_q) = -\frac{1}{2}C(U_q - U_0)^2 + E_0$$

where  $U_0$ ,  $C$ , and  $E_0$  refer to the potential of zero charge (PZC), capacitance of the corresponding system, and the energy of the system at the PZC, respectively.

Fixed potential can be calculated by changing the potential reference value of pH value through the following method:

$$U_{RHE} = U_{SHE} + 0.0592 \times pH$$

In addition, the relationship between the adsorption energy ( $E_{ads}$ ) of the reaction intermediate and pH can be derived as follows. In detail, the relationship between the total electronic energy ( $E_{int}^*$ , eV) of a given reaction intermediate and the  $U_{SHE}$  can be described by:  $E_{int}^* \text{ (eV)} = a \times U_{SHE}^2 + b \times U_{SHE} + c$ , where  $a$ ,  $b$ , and  $c$  represent the computed coefficients in Table S5,  $U_{SHE}$  can be obtained by:  $U_{SHE} = U_{RHE} - 0.0592 \times pH$ , which is pH-dependent. Moreover, the adsorption energy ( $E_{ads}$ , eV) of a given reaction intermediate can be determined by:  $E_{ads} \text{ (eV)} = E_{int}^* - E_{int}$ , where  $E^*$  and  $E_{int}$  are the total electronic energies of catalyst and a free intermediate, respectively.

**Table S1.** The correction of zero-point energy (ZPE, eV) and entropy (TS, eV) of molecules involved in NO<sub>3</sub>ER. T is set to 298.15 K.

|                         | ZPE  | TS   |
|-------------------------|------|------|
| NO <sub>3</sub> *       | 0.33 | 0.00 |
| NO <sub>2</sub> * + OH* | 0.61 | 0.00 |
| NO <sub>2</sub> *       | 0.23 | 0.00 |
| NO* + OH*               | 0.53 | 0.00 |
| NO*                     | 0.17 | 0.00 |
| N* + OH*                | 0.48 | 0.00 |
| NH* + OH*               | 0.72 | 0.00 |
| NH <sub>2</sub> * + OH* | 1.05 | 0.00 |
| OH*                     | 0.36 | 0.00 |
| NO <sub>2</sub> (g)     | 0.23 | 0.74 |
| NO <sub>3</sub> H (g)   | 0.55 | 0.77 |
| NO (g)                  | 0.12 | 0.64 |
| N <sub>2</sub> O (g)    | 0.30 | 0.70 |
| N <sub>2</sub> (g)      | 0.15 | 0.59 |
| NH <sub>3</sub> (g)     | 0.90 | 0.59 |
| H <sub>2</sub> (g)      | 0.27 | 0.41 |
| H <sub>2</sub> O (g)    | 0.56 | 0.68 |

**Table S2.** The optimized lattice parameters of unit cells ( $l$ , Å), lengths of Si-C bonds ( $d_{\text{Si-C}}$ , Å), C-C bonds ( $d_{\text{C-C}}$ , Å), and Si-Si bonds ( $d_{\text{Si-Si}}$ , Å), formation energies under C-rich ( $E_{\text{f-C}}$ , eV) and Si-rich conditions ( $E_{\text{f-Si}}$ , eV), the charge transfer ( $Q$ ,  $e$ ) from Si atoms to C atoms, and the band gaps ( $E_{\text{gap}}$ , eV) of 2D Si<sub>x</sub>C<sub>y</sub> monolayers.

| Si <sub>x</sub> C <sub>y</sub> | $l_a = l_b$ | $d_{\text{Si-C}}$ | $d_{\text{C-C}}$ | $d_{\text{Si-Si}}$ | $E_{\text{f-C}}$ | $E_{\text{f-Si}}$ | $Q$  | $E_{\text{gap}}$ |
|--------------------------------|-------------|-------------------|------------------|--------------------|------------------|-------------------|------|------------------|
| SiC                            | 3.09        | 1.78              | /                | /                  | 0.67             | 0.67              | 2.44 | 2.56             |
| SiC <sub>2</sub>               | 5.00        | 1.80              | 1.44             | /                  | 0.66             | 0.86              | 2.42 | 0.61             |
| SiC <sub>3</sub>               | 5.62        | 1.81              | 1.44             | /                  | 0.63             | 0.93              | 2.22 | /                |
| SiC <sub>5</sub>               | 4.64        | 1.76              | 1.45             | /                  | 0.52             | 0.93              | 2.51 | /                |
| SiC <sub>7</sub>               | 5.29        | 1.69              | 1.44             | /                  | 0.58             | 1.04              | 2.51 | 0.76             |
| Si <sub>3</sub> C              | 7.02        | 1.81              | /                | 2.45               | 1.20             | 0.90              | 0.74 | /                |

**Table S3.** The data on the optimized structure of Si<sub>3</sub>C nanomaterial were compared with those in the literature.

| Si <sub>3</sub> C | $l_a = l_b$ | $d_{\text{Si-C}}$ | $d_{\text{Si-Si}}$ | $E_{\text{gap}}$ |
|-------------------|-------------|-------------------|--------------------|------------------|
| Our result        | 7.02        | 1.81              | 2.45               | 0                |
| Ref. 41           | 7.02        | 1.81              | 2.25               | /                |
| Ref. 45           | 7.04        | /                 | 2.26               | 0                |

**Table S4.** The all computed free energy changes ( $\Delta G$ , eV) of each elementary step of Si<sub>3</sub>C monolayer. The  $\Delta G$  values of the selected steps are remarked in red.

| Elementary step                                                                                                 | $\Delta G$ |
|-----------------------------------------------------------------------------------------------------------------|------------|
| $\text{HNO}_3 + * \rightarrow \text{NO}_3^* + \text{H}^+$                                                       | −0.26      |
| $\text{NO}_3^* + \text{H}^+ + \text{e}^- \rightarrow \text{NO}_2^* + \text{OH}^*$                               | −1.12      |
| $\text{NO}_2^* + \text{OH}^* + \text{H}^+ + \text{e}^- \rightarrow \text{NO}_2^* + \text{H}_2\text{O}$          | 0.32       |
| $\text{NO}_2^* + \text{H}^+ + \text{e}^- \rightarrow \text{NO}^* + \text{OH}^*$                                 | −1.90      |
| $\text{NO}_2^* + \text{H}^+ + \text{e}^- \rightarrow \text{NHO}_2^*$                                            | −0.60      |
| $\text{NO}^* + \text{OH}^* + \text{H}^+ + \text{e}^- \rightarrow \text{NO}^*(\text{side}) + \text{H}_2\text{O}$ | 0.37       |
| $\text{NHO}_2^* + \text{H}^+ + \text{e}^- \rightarrow \text{NHO}^* + \text{OH}^*$                               | −2.05      |
| $\text{NO}^* + \text{OH}^* + \text{H}^+ + \text{e}^- \rightarrow \text{NO}^*(\text{end}) + \text{H}_2\text{O}$  | 1.07       |
| $\text{NO}^*(\text{side}) + \text{H}^+ + \text{e}^- \rightarrow \text{N}^* + \text{OH}^*$                       | −2.54      |
| $\text{NO}^*(\text{side}) + \text{H}^+ + \text{e}^- \rightarrow \text{NHO}^*$                                   | −0.36      |
| $\text{NHO}^* + \text{OH}^* + \text{H}^+ + \text{e}^- \rightarrow \text{NHO}^* + \text{H}_2\text{O}$            | 0.36       |
| $\text{NHO}^* + \text{OH}^* + \text{H}^+ + \text{e}^- \rightarrow \text{NH}_2\text{O}^* + \text{OH}^*$          | −0.17      |
| $\text{NO}^*(\text{end}) + \text{H}^+ + \text{e}^- \rightarrow \text{NOH}^*$                                    | 0.29       |
| $\text{NO}^*(\text{end}) + \text{H}^+ + \text{e}^- \rightarrow \text{NHO}^*$                                    | 0.34       |
| $\text{N}^* + \text{OH}^* + \text{H}^+ + \text{e}^- \rightarrow \text{NH}^* + \text{OH}^*$                      | −0.62      |
| $\text{N}^* + \text{OH}^* + \text{H}^+ + \text{e}^- \rightarrow \text{N}^* + \text{H}_2\text{O}$                | 0.67       |
| $\text{NHO}^* + \text{H}^+ + \text{e}^- \rightarrow \text{NH}_2\text{O}^*$                                      | −0.01      |
| $\text{NHO}^* + \text{H}^+ + \text{e}^- \rightarrow \text{NH}^* + \text{OH}^*$                                  | −2.56      |
| $\text{NH}_2\text{O}^* + \text{OH}^* + \text{H}^+ + \text{e}^- \rightarrow \text{NH}_2\text{O}^*$               | 0.56       |
| $\text{NOH}^* + \text{H}^+ + \text{e}^- \rightarrow \text{N}^* + \text{H}_2\text{O}$                            | −2.89      |
| $\text{NHO}^* + \text{H}^+ + \text{e}^- \rightarrow \text{NHOH}^*$                                              | −1.03      |
| $\text{NH}^* + \text{OH}^* + \text{H}^+ + \text{e}^- \rightarrow \text{NH}_2^* + \text{OH}^*$                   | −0.07      |
| $\text{NH}_2\text{O}^* + \text{H}^+ + \text{e}^- \rightarrow \text{O}^* + \text{H}_2\text{O}$                   | −2.61      |
| $\text{N}^* + \text{H}^+ + \text{e}^- \rightarrow \text{NH}^*$                                                  | −0.78      |
| $\text{NHOH}^* + \text{H}^+ + \text{e}^- \rightarrow \text{NH}^* + \text{H}_2\text{O}$                          | −2.64      |
| $\text{NH}_2^* + \text{OH}^* + \text{H}^+ + \text{e}^- \rightarrow \text{OH}^* + \text{NH}_3$                   | 0.16       |
| $\text{O}^* + \text{H}^+ + \text{e}^- \rightarrow \text{OH}^*$                                                  | 0.27       |
| $\text{NH}^* + \text{H}^+ + \text{e}^- \rightarrow \text{NH}_2^*$                                               | 0.26       |
| $\text{OH}^* + \text{H}^+ + \text{e}^- \rightarrow \text{H}_2\text{O} + *$                                      | 0.43       |
| $\text{NH}_2^* + \text{H}^+ + \text{e}^- \rightarrow \text{NH}_3^*$                                             | 0.02       |
| $\text{NH}_3^* \rightarrow \text{NH}_3 + *$                                                                     | −0.24      |

**Table S5.** The quadratic relation between the energy (E) of the reaction intermediates and dependence of applied electrochemical potential U.

| Reaction intermediates        | Energy (E)                                    | R <sup>2</sup> |
|-------------------------------|-----------------------------------------------|----------------|
| *                             | $E = -1.26\text{U}^2 - 0.91\text{U} - 417.14$ | 0.98           |
| $\text{NO}_3^*$               | $E = -2.71\text{U}^2 - 1.21\text{U} - 443.74$ | 0.96           |
| $\text{NO}_2^* + \text{OH}^*$ | $E = -2.81\text{U}^2 - 1.54\text{U} - 448.52$ | 0.99           |
| $\text{NO}_2^*$               | $E = -2.44\text{U}^2 - 1.03\text{U} - 436.95$ | 0.99           |
| $\text{NO}^* + \text{OH}^*$   | $E = -2.09\text{U}^2 - 0.86\text{U} - 442.58$ | 0.98           |
| $\text{NO}^*$                 | $E = -1.45\text{U}^2 - 0.48\text{U} - 430.94$ | 0.99           |
| $\text{N}^* + \text{OH}^*$    | $E = -2.09\text{U}^2 - 1.32\text{U} - 437.61$ | 0.97           |
| $\text{NH}^* + \text{OH}^*$   | $E = -1.55\text{U}^2 - 0.81\text{U} - 441.68$ | 0.99           |
| $\text{NH}_2^* + \text{OH}^*$ | $E = -1.49\text{U}^2 - 1.29\text{U} - 445.75$ | 0.94           |
| $\text{OH}^*$                 | $E = -1.71\text{U}^2 - 1.02\text{U} - 428.91$ | 0.99           |

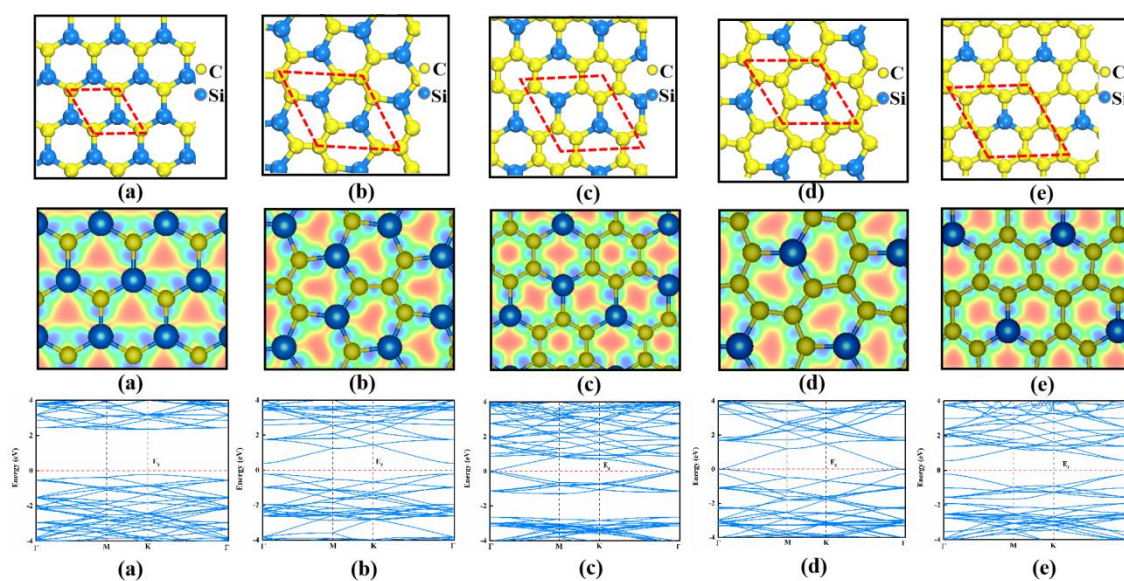

**Figure S1.** The optimized structures, charge density distribution, and the band structures of (a) SiC, (b) SiC<sub>2</sub>, (c) SiC<sub>3</sub>, (d) SiC<sub>5</sub>, and (e) SiC<sub>7</sub> monolayers. The isovalue was set to 0.003 e Å<sup>-3</sup>, and yellow and red bubbles represent positive and negative charges, respectively. The Fermi level was set to zero in red dotted lines.

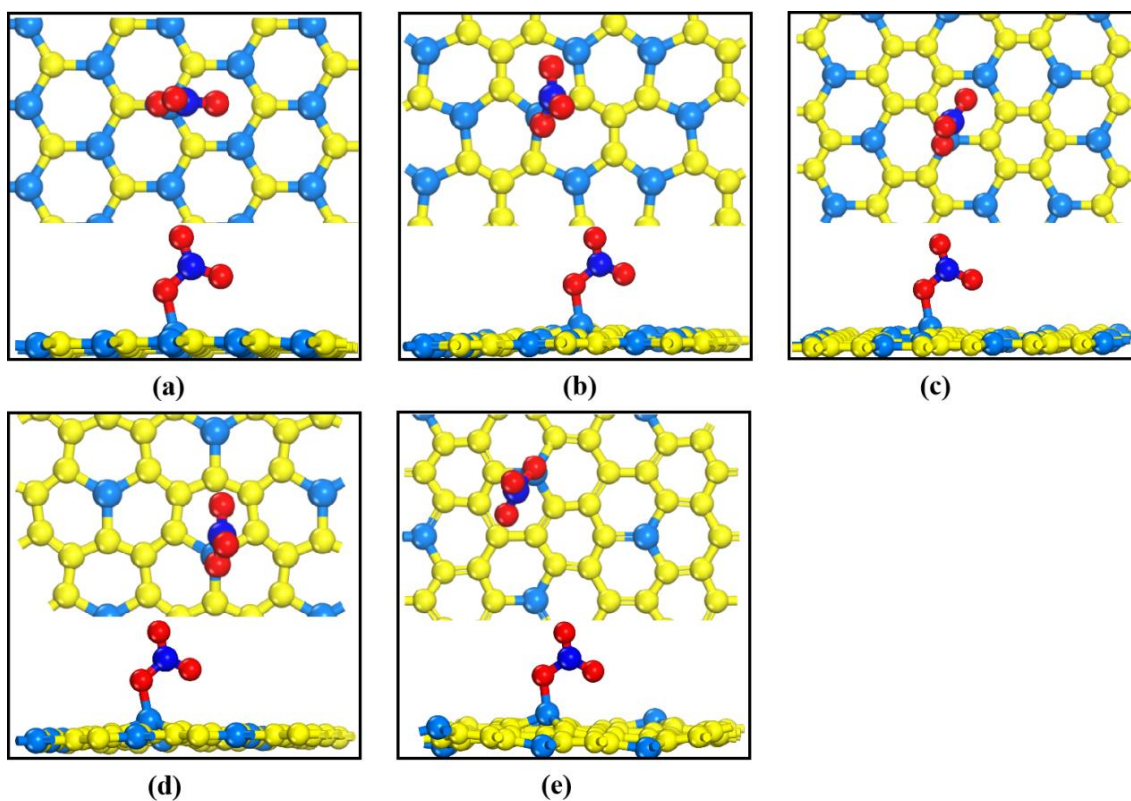

**Figure S2.** The most stable NO<sub>3</sub><sup>\*</sup> adsorption configurations were viewed from the top and side of these catalysts of (a) SiC, (b) SiC<sub>2</sub>, (c) SiC<sub>3</sub>, (d) SiC<sub>5</sub>, and (e) SiC<sub>7</sub> monolayers.

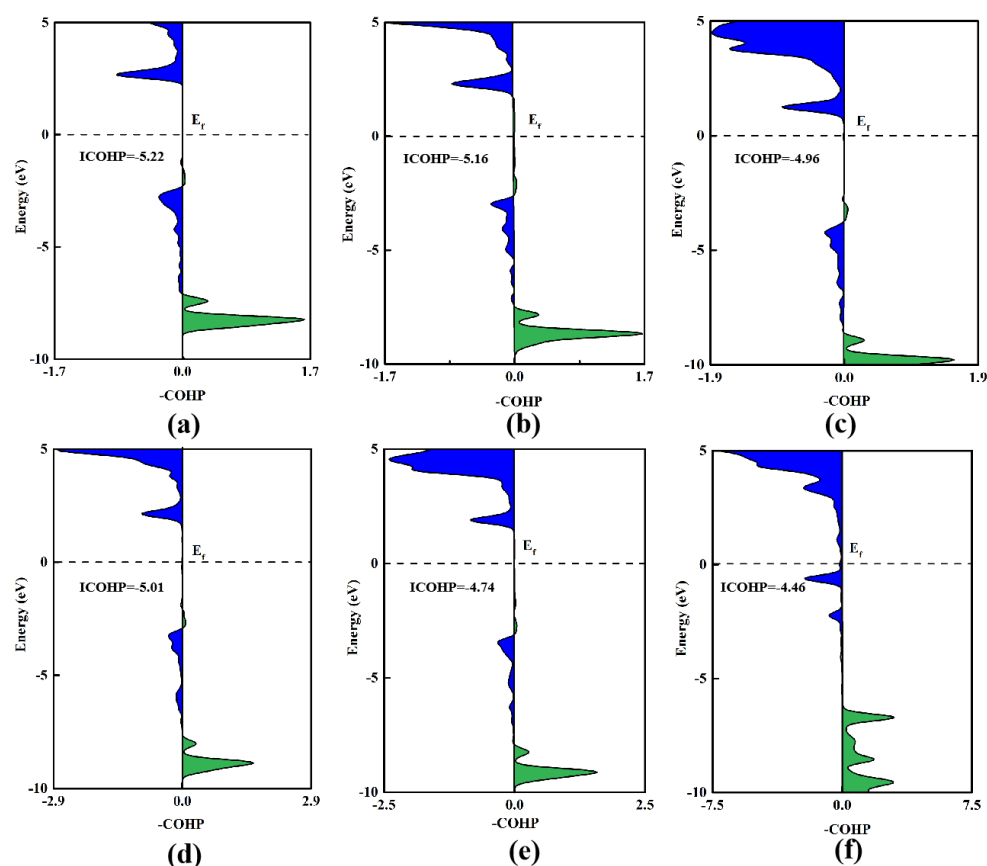

**Figure S3.** The integrated-crystal orbital Hamilton population (ICOHP) about N-O which from  $\text{NO}_3^*$  is adsorbed species on (a) SiC, (b)  $\text{SiC}_2$ , (c)  $\text{SiC}_3$ , (d)  $\text{SiC}_5$ , (e)  $\text{SiC}_7$  and (f)  $\text{Si}_3\text{C}$  monolayers.

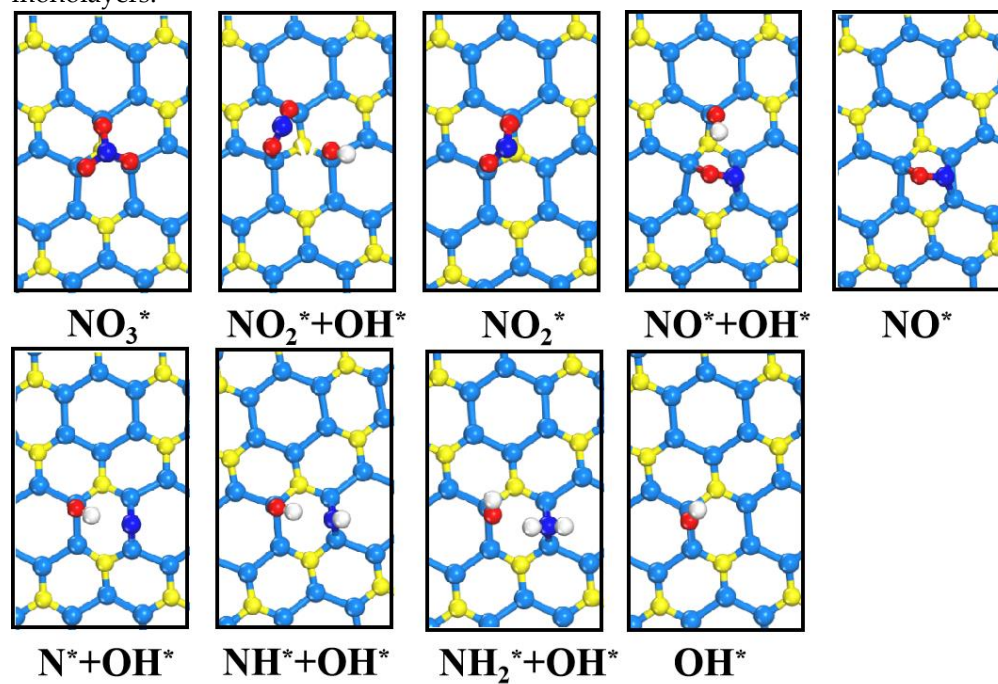

**Figure S4.** The involved configurations of intermediates for  $\text{NO}_3\text{ER}$  on  $\text{Si}_3\text{C}$  monolayer.

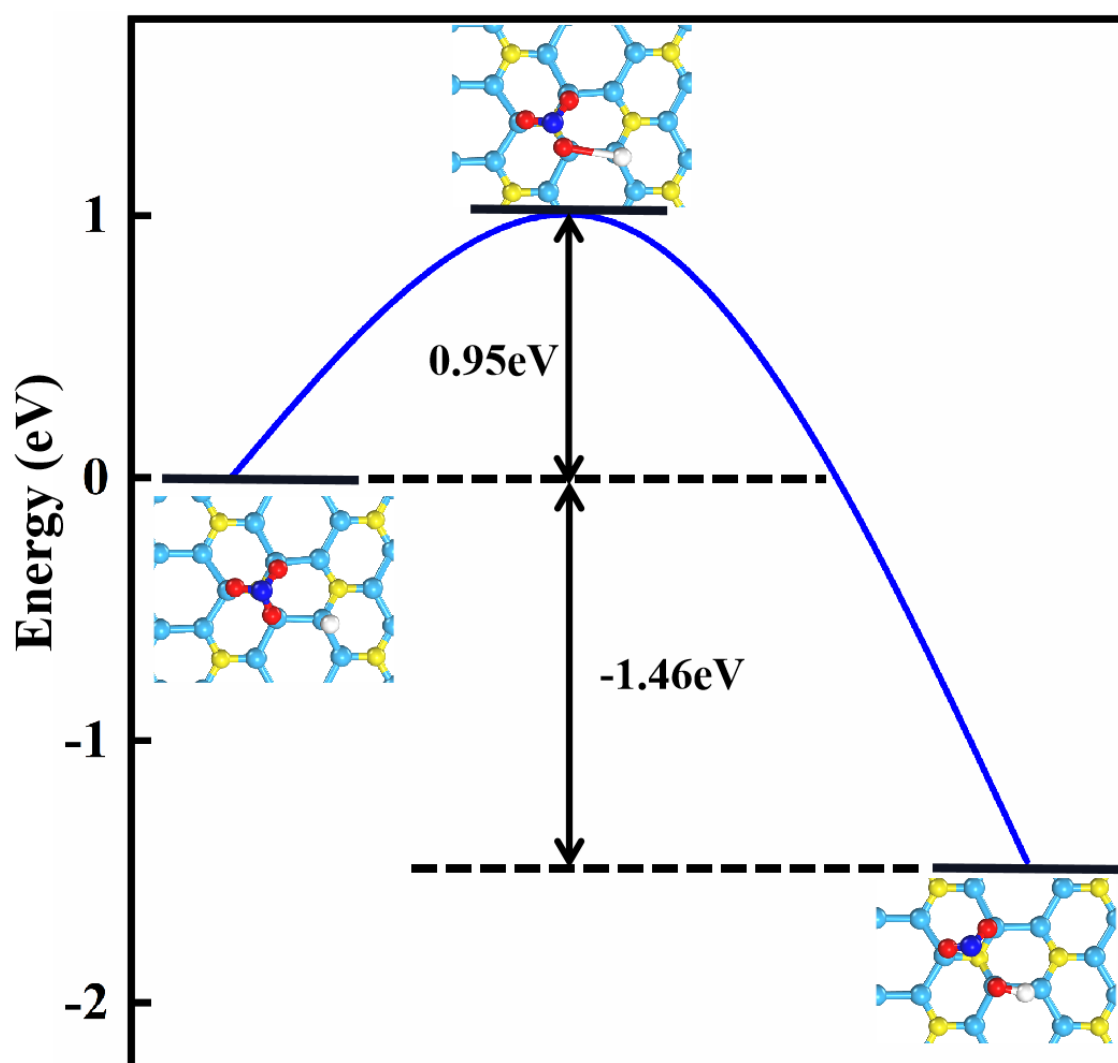

**Figure S5.** The kinetic process for the dissociation of  $\text{NO}_3^*$  with the help of  $\text{H}^+$  to  $\text{NO}_2^* + \text{OH}^*$  on  $\text{Si}_3\text{C}$  monolayer.

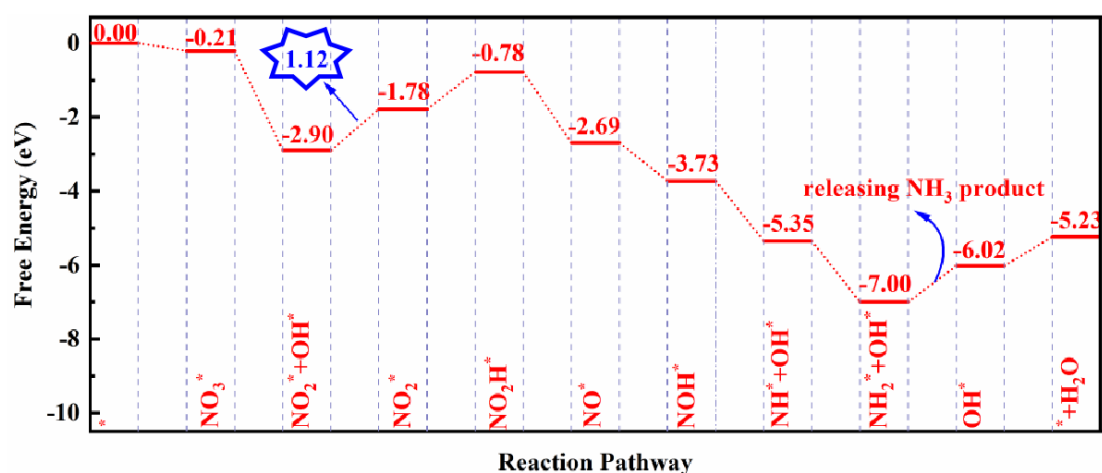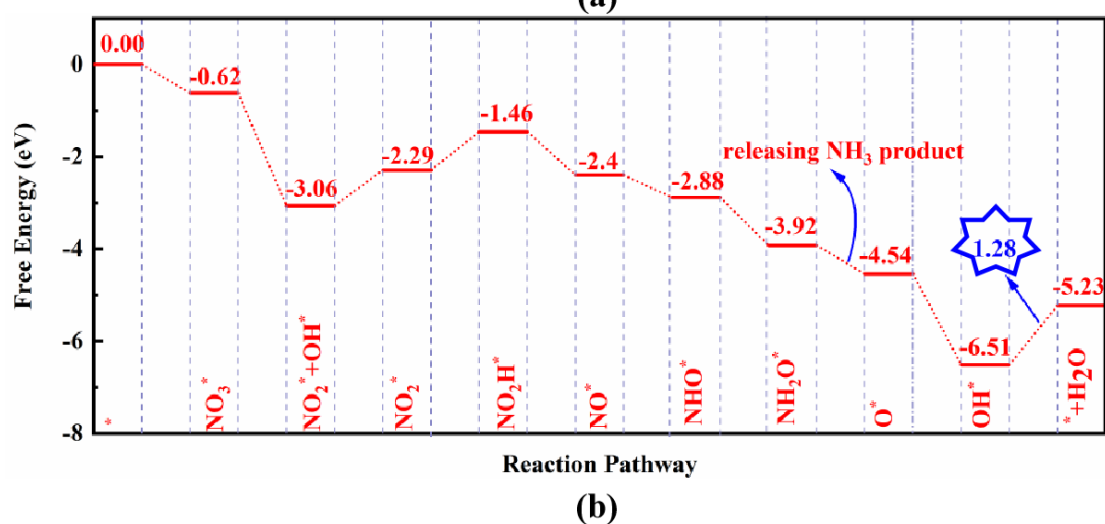

Figure S6. The obtained free energy diagrams of NO<sub>3</sub>ER on (a) SiC<sub>3</sub> and (b) SiC<sub>7</sub> catalysts.

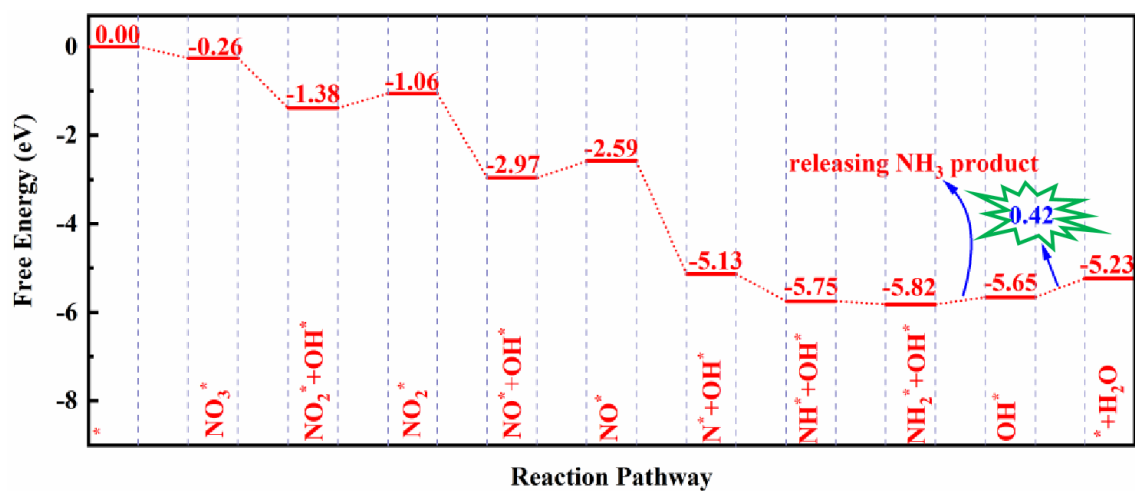

Figure S7. The free energy diagram of NO<sub>3</sub>ER on Si<sub>3</sub>C obtained by rPBE method.



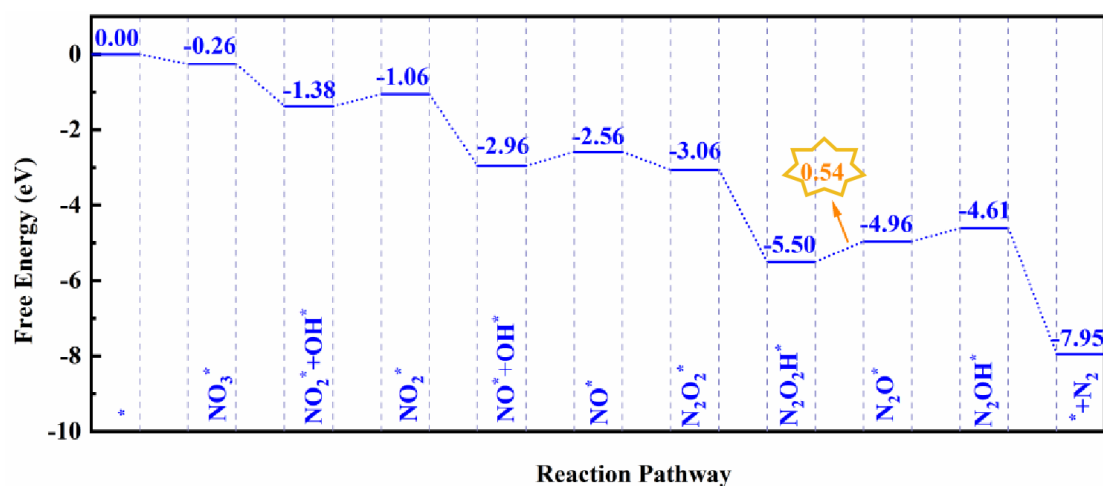

Figure S8. The obtained free energy diagram of  $N_2$  formation on  $Si_3C$  monolayer.

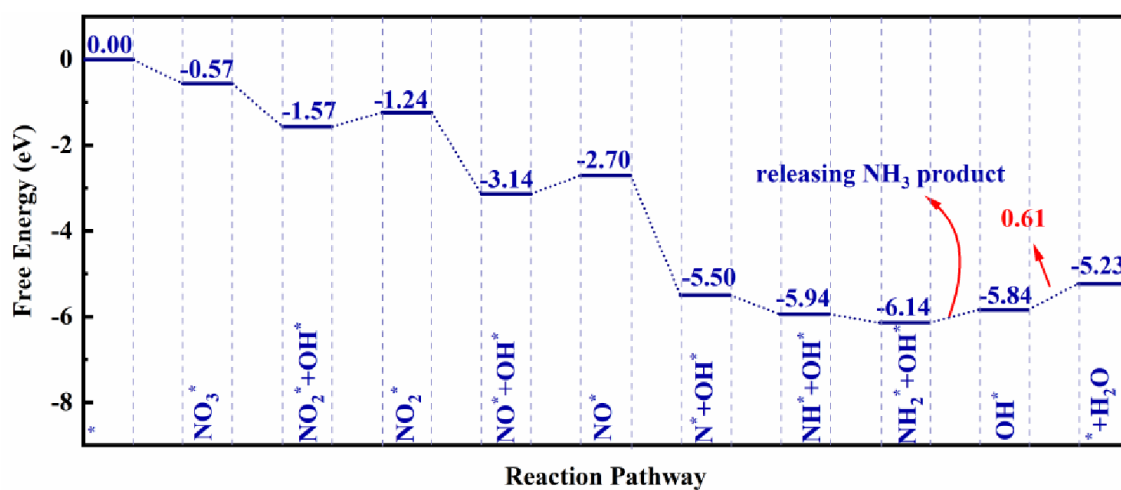

Figure S9. The involved free energy profile for  $NO_3$ -to- $NH_3$  electrocatalytic reduction on  $Si_3C$  monolayer at  $pH = 2.90$ .

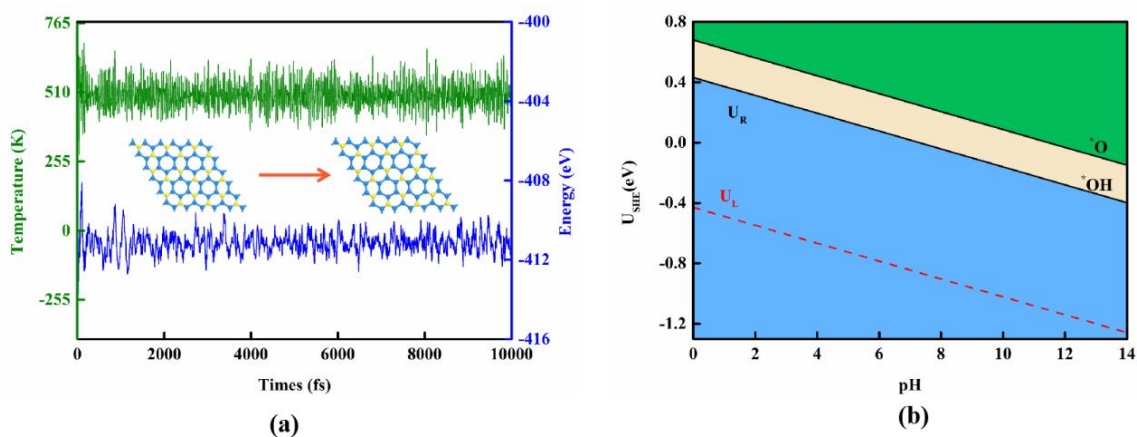

Figure S10. (a) Variations of temperature and energy as a function of the time for AIMD simulations and (b) Pourbaix profile of  $Si_3C$  monolayer.
